# Supplementary material for: Predicting sequence and structural specificities of RNA binding regions recognized by splicing factor SRSF1
Source: PubMed Central journal article supplement (PMC3287504; doi:10.1186/1471-2164-12-s5-s8), 2011-12-23
Supplement: 1471-2164-12-S5-S8-S1.pdf [file 1471-2164-12-S5-S8-S1.pdf]

(A)

|           | <b>G</b> | <b>A</b> | <b>A</b> | <b>G</b> | <b>A</b> | <b>A</b> |
|-----------|----------|----------|----------|----------|----------|----------|
| <b>A</b>  | 0.32     | 1.00     | 1.00     | 0.08     | 1.00     | 1.00     |
| <b>G</b>  | 1.00     | 0.69     | 0.87     | 1.00     | 0.79     | 1.00     |
| <b>C</b>  | 0.08     | 0.33     | 0.13     | 0.41     | 0.42     | 0.68     |
| <b>U</b>  | 0.05     | 0.23     | 0.71     | 0.07     | 0.24     | 0.94     |
| <b>UP</b> | 0.96     | 0.99     | 0.61     | 0.89     | 0.98     | 0.79     |

(B)

|           | <b>A</b> | <b>G</b> | <b>A</b> | <b>A</b> | <b>G</b> | <b>A</b> | <b>A</b> |
|-----------|----------|----------|----------|----------|----------|----------|----------|
| <b>A</b>  | 1.00     | 0.14     | 1.00     | 1.00     | 0.26     | 1.00     | 1.00     |
| <b>G</b>  | 0.96     | 1.00     | 0.49     | 0.97     | 1.00     | 0.82     | 0.99     |
| <b>C</b>  | 0.72     | 0.22     | 0.46     | 0.12     | 0.41     | 0.32     | 0.67     |
| <b>U</b>  | 0.92     | 0.08     | 0.40     | 0.73     | 0.07     | 0.00     | 0.72     |
| <b>UP</b> | 1.00     | 0.94     | 1.00     | 0.97     | 0.91     | 0.99     | 0.75     |
